# Supplementary material
Source: Springer Nature journal article supplement (https://www.springermedizin.de/resource/supplementary/12882_2013_719_MOESM4_ESM.pdf/9454446)

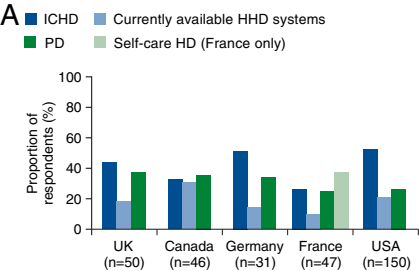

n = number of respondents per country

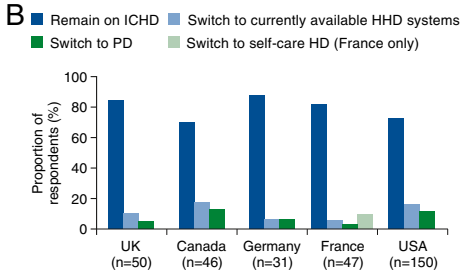

Supplement: MOESM4 [file 9454446]
